# Supplementary material for: Assessment of multi-population polygenic risk scores for lipid traits in African Americans
Source: PeerJ. 2023 May 16;11:e14910. doi: 10.7717/peerj.14910 (PMC10198155; doi:10.7717/peerj.14910)
Supplement: Supplemental Information 5 — Results of tests of association are given here formatted for Synthesis View. These summary statistics include SNP ID (rs number), chromosome (chr) and position (NCBI36/hg18), p-value (pval), beta as the effect size (es), and coded allele frequency (caf). Summary statistics are given for unadjusted and adjusted tests of association between each SNP and lipid trait. Adjusted models are models adjusted for age, sex, body mass index, and principal components. [file peerj-11-14910-s005.xlsx]

## Sheet: HDL_unadjusted_premedication
SNP	Chr	pos	Group1:pval	Group1:es	Group1:caf
rs6754295	2	21059688	0.03863	1.091	0.2706
rs7557067	2	21061717	0.2953	0.6894	0.1483
rs1042034	2	21078786	0.3536	0.6084	0.1504
rs676210	2	21085029	0.3535	0.61	0.1499
rs4731702	7	130083924	0.1288	-0.8037	0.2764
rs9987289	8	9220768	0.01565	1.503	0.1813
rs2126259	8	9222556	0.01868	1.523	0.1639
rs15285	8	19868947	0.6731	-0.198	0.4941
rs10096633	8	19875201	0.1566	-0.6744	0.4081
rs17482753	8	19876926	0.9059	-0.1157	0.06229
rs12678919	8	19888502	0.2519	-0.8791	0.1092
rs4407894	8	19978176	0.2475	-0.7228	0.1681
rs2515629	9	106634185	0.012	1.591	0.1742
rs1883025	9	106704122	0.07001	-0.9145	0.3262
rs7350481	11	116091493	0.5132	-1.345	0.0151
rs1558861	11	116112647	0.7285	0.6673	0.01684
rs2160669	11	116152817	0.4736	0.7091	0.05874
rs6589566	11	116157633	0.6698	0.8422	0.01625
rs2075290	11	116158506	0.4589	0.7329	0.0587
rs2266788	11	116165896	0.7216	0.6995	0.01641
rs10468017	15	56465804	0.5969	-0.3356	0.1672
rs2043085	15	56468246	0.9866	-0.00816	0.3777
rs1532085	15	56470658	0.3709	0.4249	0.4836
rs1077834	15	56510771	0.4672	0.3428	0.4953
rs8034802	15	56512084	0.9571	-0.02641	0.3516
rs173539	16	55545545	0.3086	0.5138	0.3589
rs247617	16	55548217	0.998	0.001348	0.2539
rs3764261	16	55550825	0.7389	0.1726	0.3146
rs17231506	16	55552029	0.994	-0.005116	0.1453
rs1800775	16	55552737	0.522	-0.3044	0.4291
rs1864163	16	55554734	0.3566	-0.486	0.2817
rs11076174	16	55560647	0.6024	-0.3782	0.127
rs7205804	16	55562390	0.3299	-0.6144	0.1656
rs1532624	16	55562980	0.2222	-0.7706	0.1635
rs7499892	16	55564091	0.7001	-0.1887	0.3592
rs5883	16	55564854	0.428	0.6111	0.108
rs5880	16	55572592	0.4619	1.437	0.01366
rs16942887	16	66485543	0.8088	-0.1408	0.2099
rs255052	16	66582496	0.9543	-0.03339	0.2114
rs9958734	18	45372396	0.07386	-1.364	0.1031
rs737337	19	11208493	0.9278	0.04337	0.4214
rs1800961	20	42475778	0.8865	-0.4678	0.005552

## Sheet: LDL_unadjusted_premedication
SNP	Chr	pos	Group1:pval	Group1:es	Group1:caf
rs11591147	1	55278235	0.4232	7.06	0.003134
rs11806638	1	55290748	0.9322	0.09976	0.3141
rs2495477	1	55291055	0.5462	0.7154	0.2941
rs28362286	1	55301803	0.3598	-4.47	0.009135
rs3850634	1	62823186	0.6592	-0.4875	0.3889
rs660240	1	109619361	0.4391	0.8603	0.3366
rs646776	1	109620053	0.4748	0.7914	0.3437
rs599839	1	109623689	0.07327	-2.111	0.3012
rs12713956	2	21095010	0.2682	-1.556	0.1787
rs1367117	2	21117405	0.419	1.317	0.1208
rs515135	2	21139562	0.7807	0.3009	0.4686
rs668948	2	21145034	0.4038	-0.8936	0.4528
rs541041	2	21148480	0.3725	-0.9537	0.4535
rs6544713	2	43927385	0.263	-1.667	0.1602
rs4245791	2	43927935	0.748	-0.5268	0.1315
rs1423527	5	74638455	0.5513	-0.6461	0.4172
rs3846662	5	74686840	0.3493	1.406	0.1487
rs12916	5	74692295	0.3703	-1.095	0.2536
rs6882076	5	156322875	0.142	-1.617	0.3724
rs507666	9	135139220	0.3529	1.665	0.1023
rs579459	9	135143989	0.1117	2.531	0.1337
rs174546	11	61326406	0.2027	-2.285	0.09053
rs174547	11	61327359	0.2109	-2.243	0.09059
rs174548	11	61327924	0.4815	-0.9169	0.2174
rs174550	11	61328054	0.2069	-2.263	0.09059
rs6511720	19	11063306	0.5284	0.9984	0.1342
rs2228671	19	11071912	0.8781	-0.4418	0.03672
rs688	19	11088602	0.4486	-1.252	0.116
rs737337	19	11208493	0.07514	1.936	0.4214
rs8106922	19	50093506	0.02689	-2.764	0.2452
rs769449	19	50101842	0.6172	1.68	0.02602
rs445925	19	50107480	0.2109	1.521	0.2796
rs12721054	19	50114427	0.7449	0.5512	0.1139
rs12721109	19	50139061	0.8303	-1.569	0.00497

## Sheet: lnTG_unadjusted_premedication
SNP	Chr	pos	Group1:pval	Group1:es	Group1:caf
rs1168013	1	62769426	0.1868	0.01919	0.3556
rs3850634	1	62823186	0.5311	-0.008988	0.3889
rs6587980	1	62863446	0.7826	-0.003912	0.4197
rs6754295	2	21059688	0.06215	-0.02876	0.2706
rs7557067	2	21061717	0.265	-0.02154	0.1483
rs1042034	2	21078786	0.2754	-0.02091	0.1504
rs676210	2	21085029	0.2904	-0.02031	0.1499
rs1260326	2	27584444	0.4468	0.01482	0.1418
rs780094	2	27594741	0.478	0.01267	0.1742
rs780093	2	27596107	0.3573	0.01754	0.1468
rs13231516	7	72501185	0.3039	-0.03474	0.04343
rs714052	7	72502805	0.2965	-0.03528	0.04343
rs17145738	7	72620810	0.775	-0.006978	0.08865
rs3812316	7	72658273	0.3738	-0.02968	0.04519
rs4731702	7	130083924	0.4469	0.01171	0.2764
rs15285	8	19868947	0.2341	-0.01638	0.4941
rs10096633	8	19875201	0.7423	-0.004601	0.4081
rs17482753	8	19876926	0.606	-0.01484	0.06229
rs12678919	8	19888502	0.9851	0.0004201	0.1092
rs4407894	8	19978176	0.5087	0.01219	0.1681
rs2954021	8	126551259	0.39	-0.5072	4.623e-05
rs2954022	8	126551803	0.9354	0.001149	0.3646
rs2954029	8	126560154	0.7642	0.004357	0.3375
rs10808546	8	126565000	0.817	-0.003411	0.3303
rs174546	11	61326406	0.3342	-0.0227	0.09053
rs174547	11	61327359	0.3252	-0.02312	0.09059
rs174548	11	61327924	0.7712	0.004892	0.2174
rs174550	11	61328054	0.328	-0.02299	0.09059
rs174570	11	61353788	0.3546	-0.0305	0.04469
rs174577	11	61361390	0.8417	-0.002893	0.3765
rs1145198	11	116079546	0.7493	0.005519	0.1998
rs7350481	11	116091493	0.3954	-0.05271	0.0151
rs1558861	11	116112647	0.7808	-0.01592	0.01684
rs28927680	11	116124283	0.3709	-0.01667	0.1582
rs2160669	11	116152817	0.6328	-0.01398	0.05874
rs12286037	11	116157417	0.471	-0.01221	0.194
rs6589566	11	116157633	0.7094	-0.02201	0.01625
rs2075290	11	116158506	0.8191	-0.006714	0.0587
rs603446	11	116159645	0.2102	0.0219	0.193
rs2266788	11	116165896	0.7083	-0.02199	0.01641
rs2075291	11	116166602	0.3392	-0.1116	0.003135
rs651821	11	116167789	0.1855	0.02576	0.1525
rs9804646	11	116170289	0.3632	-0.01327	0.3403
rs2075292	11	116237722	0.6088	0.01297	0.08647
rs508487	11	116580776	0.03552	-0.1338	0.01419
rs1077834	15	56510771	0.02469	0.0312	0.4953
rs10401969	19	19268718	0.06413	-0.03533	0.1666
rs439401	19	50106291	0.4227	0.01533	0.1568
rs445925	19	50107480	0.2472	0.01809	0.2796
rs12721054	19	50114427	0.1693	-0.03028	0.1139

## Sheet: TC_unadjusted_premedication
SNP	Chr	pos	Group1:pval	Group1:es	Group1:caf
rs11591147	1	55278235	0.6443	3.961	0.003134
rs11806638	1	55290748	0.8025	-0.29	0.3141
rs2495477	1	55291055	0.7014	0.4496	0.2941
rs28362286	1	55301803	0.3581	-4.841	0.009135
rs1168013	1	62769426	0.05513	2.122	0.3556
rs3850634	1	62823186	0.7667	-0.3262	0.3889
rs6587980	1	62863446	0.3194	1.078	0.4197
rs660240	1	109619361	0.6064	0.5687	0.3366
rs646776	1	109620053	0.601	0.5745	0.3437
rs599839	1	109623689	0.07223	-2.078	0.3012
rs12713956	2	21095010	0.1379	-2.049	0.1787
rs1367117	2	21117405	0.3967	1.365	0.1208
rs515135	2	21139562	0.3636	0.967	0.4686
rs668948	2	21145034	0.5049	-0.7011	0.4528
rs541041	2	21148480	0.431	-0.8277	0.4535
rs1260326	2	27584444	0.5874	0.8039	0.1418
rs780094	2	27594741	0.3932	1.166	0.1742
rs780093	2	27596107	0.192	1.899	0.1468
rs6544713	2	43927385	0.2296	-1.746	0.1602
rs4245791	2	43927935	0.5721	-0.8928	0.1315
rs1423527	5	74638455	0.7298	-0.3694	0.4172
rs3846662	5	74686840	0.5409	0.8985	0.1487
rs12916	5	74692295	0.4385	-0.9316	0.2536
rs6882076	5	156322875	0.6157	-0.5521	0.3724
rs507666	9	135139220	0.349	1.652	0.1023
rs579459	9	135143989	0.1645	2.169	0.1337
rs7350481	11	116091493	0.09334	7.607	0.0151
rs1558861	11	116112647	0.09379	7.062	0.01684
rs2160669	11	116152817	0.02343	5.032	0.05874
rs6589566	11	116157633	0.05268	8.408	0.01625
rs2075290	11	116158506	0.02362	5.044	0.0587
rs2266788	11	116165896	0.05094	8.44	0.01641
rs651821	11	116167789	0.2696	1.637	0.1525
rs173539	16	55545545	0.1406	1.658	0.3589
rs247617	16	55548217	0.5039	0.8232	0.2539
rs3764261	16	55550825	0.3368	1.103	0.3146
rs17231506	16	55552029	0.8948	-0.2019	0.1453
rs1864163	16	55554734	0.06612	-2.171	0.2817
rs6511720	19	11063306	0.247	1.805	0.1342
rs2228671	19	11071912	0.5683	-1.644	0.03672
rs688	19	11088602	0.9343	0.136	0.116
rs737337	19	11208493	0.03902	2.21	0.4214
rs8106922	19	50093506	0.0001489	-4.689	0.2452
rs769449	19	50101842	0.7255	-1.152	0.02602
rs445925	19	50107480	0.3058	1.227	0.2796
rs12721054	19	50114427	0.4261	1.34	0.1139

## Sheet: HDL_adjusted_premedication
SNP	Chr	pos	Group1:pval	Group1:es	Group1:caf
rs6754295	2	21059688	0.1347	1.048	0.2706
rs7557067	2	21061717	0.4173	0.7244	0.1483
rs1042034	2	21078786	0.7275	0.3104	0.1504
rs676210	2	21085029	0.7083	0.3344	0.1499
rs4731702	7	130083924	0.2349	-0.8495	0.2764
rs9987289	8	9220768	0.009757	2.163	0.1813
rs2126259	8	9222556	0.04824	1.723	0.1639
rs15285	8	19868947	0.04931	-1.235	0.4941
rs10096633	8	19875201	0.0226	-1.459	0.4081
rs17482753	8	19876926	0.8811	0.2029	0.06229
rs12678919	8	19888502	0.6119	-0.5241	0.1092
rs4407894	8	19978176	0.8669	-0.1412	0.1681
rs2515629	9	106634185	0.08652	1.436	0.1742
rs1883025	9	106704122	0.1393	-1.018	0.3262
rs7350481	11	116091493	0.7881	0.8623	0.0151
rs1558861	11	116112647	0.4079	2.33	0.01684
rs2160669	11	116152817	0.1543	2	0.05874
rs6589566	11	116157633	0.6106	1.471	0.01625
rs2075290	11	116158506	0.1543	2	0.0587
rs2266788	11	116165896	0.6056	1.49	0.01641
rs10468017	15	56465804	0.2592	-0.9817	0.1672
rs2043085	15	56468246	0.9026	0.0812	0.3777
rs1532085	15	56470658	0.1666	0.8895	0.4836
rs1077834	15	56510771	0.5592	0.3686	0.4953
rs8034802	15	56512084	0.5926	0.3512	0.3516
rs173539	16	55545545	0.1303	1.047	0.3589
rs247617	16	55548217	0.9462	0.05003	0.2539
rs3764261	16	55550825	0.4475	0.5342	0.3146
rs17231506	16	55552029	0.4307	-0.7324	0.1453
rs1800775	16	55552737	0.03071	-1.385	0.4291
rs1864163	16	55554734	0.6639	-0.3129	0.2817
rs11076174	16	55560647	0.3429	-0.9429	0.127
rs7205804	16	55562390	0.4625	-0.6647	0.1656
rs1532624	16	55562980	0.2313	-1.083	0.1635
rs7499892	16	55564091	0.5376	0.4121	0.3592
rs5883	16	55564854	0.3988	0.8783	0.108
rs5880	16	55572592	0.7568	0.8307	0.01366
rs16942887	16	66485543	0.8163	-0.1811	0.2099
rs255052	16	66582496	0.8373	-0.1591	0.2114
rs9958734	18	45372396	0.2637	-1.149	0.1031
rs737337	19	11208493	0.9319	-0.05595	0.4214
rs1800961	20	42475778	0.7415	-1.356	0.005552

## Sheet: LDL_adjusted_premedication
SNP	Chr	pos	Group1:pval	Group1:es	Group1:caf
rs11591147	1	55278235	0.9227	-1.316	0.003134
rs11806638	1	55290748	0.8236	0.3634	0.3141
rs2495477	1	55291055	0.9083	0.1946	0.2941
rs28362286	1	55301803	0.9847	-0.1258	0.009135
rs3850634	1	62823186	0.6569	0.6968	0.3889
rs660240	1	109619361	0.1298	2.41	0.3366
rs646776	1	109620053	0.0877	2.698	0.3437
rs599839	1	109623689	0.4983	-1.17	0.3012
rs12713956	2	21095010	0.503	-1.335	0.1787
rs1367117	2	21117405	0.2375	2.864	0.1208
rs515135	2	21139562	0.9311	-0.1529	0.4686
rs668948	2	21145034	0.7751	-0.5051	0.4528
rs541041	2	21148480	0.8254	-0.3892	0.4535
rs6544713	2	43927385	0.1024	-3.426	0.1602
rs4245791	2	43927935	0.2597	-2.62	0.1315
rs1423527	5	74638455	0.5504	0.8878	0.4172
rs3846662	5	74686840	0.2307	2.654	0.1487
rs12916	5	74692295	0.4171	-1.367	0.2536
rs6882076	5	156322875	0.634	-0.7469	0.3724
rs507666	9	135139220	0.7092	-0.9243	0.1023
rs579459	9	135143989	0.7005	0.8596	0.1337
rs174546	11	61326406	0.01085	-6.985	0.09053
rs174547	11	61327359	0.01085	-6.985	0.09059
rs174548	11	61327924	0.9272	-0.1663	0.2174
rs174550	11	61328054	0.01085	-6.985	0.09059
rs6511720	19	11063306	0.501	-1.498	0.1342
rs2228671	19	11071912	0.6573	-1.805	0.03672
rs688	19	11088602	0.6246	-1.205	0.116
rs737337	19	11208493	0.192	2.002	0.4214
rs8106922	19	50093506	0.4299	-1.377	0.2452
rs769449	19	50101842	0.4885	-3.352	0.02602
rs445925	19	50107480	0.4219	1.373	0.2796
rs12721054	19	50114427	0.265	-2.553	0.1139
rs12721109	19	50139061	0.7645	3.273	0.00497

## Sheet: lnTG_adjusted_premedication
SNP	Chr	pos	Group1:pval	Group1:es	Group1:caf
rs1168013	1	62769426	0.871	0.003518	0.3556
rs3850634	1	62823186	0.6718	0.009053	0.3889
rs6587980	1	62863446	0.8078	-0.005028	0.4197
rs6754295	2	21059688	0.08619	-0.03851	0.2706
rs7557067	2	21061717	0.779	-0.007993	0.1483
rs1042034	2	21078786	0.9529	0.001676	0.1504
rs676210	2	21085029	0.8826	0.004202	0.1499
rs1260326	2	27584444	0.877	0.00468	0.1418
rs780094	2	27594741	0.6803	0.01099	0.1742
rs780093	2	27596107	0.7576	0.008994	0.1468
rs13231516	7	72501185	0.2123	0.06273	0.04343
rs714052	7	72502805	0.2262	0.06084	0.04343
rs17145738	7	72620810	0.3164	0.03664	0.08865
rs3812316	7	72658273	0.1608	0.06934	0.04519
rs4731702	7	130083924	0.7425	0.007529	0.2764
rs15285	8	19868947	0.2256	0.02452	0.4941
rs10096633	8	19875201	0.2833	0.02208	0.4081
rs17482753	8	19876926	0.1518	-0.062	0.06229
rs12678919	8	19888502	0.1296	-0.04995	0.1092
rs4407894	8	19978176	0.8251	-0.005998	0.1681
rs2954021	8	126551259	0.6753	-0.2404	4.623e-05
rs2954022	8	126551803	0.7433	0.006831	0.3646
rs2954029	8	126560154	0.6091	0.011	0.3375
rs10808546	8	126565000	0.2966	-0.02239	0.3303
rs174546	11	61326406	0.006243	-0.1025	0.09053
rs174547	11	61327359	0.006243	-0.1025	0.09059
rs174548	11	61327924	0.4185	-0.02	0.2174
rs174550	11	61328054	0.006243	-0.1025	0.09059
rs174570	11	61353788	0.09304	-0.08584	0.04469
rs174577	11	61361390	0.1858	-0.02812	0.3765
rs1145198	11	116079546	0.9259	-0.002388	0.1998
rs7350481	11	116091493	0.7555	-0.03221	0.0151
rs1558861	11	116112647	0.7649	-0.02671	0.01684
rs28927680	11	116124283	0.4346	-0.02073	0.1582
rs2160669	11	116152817	0.7572	0.01386	0.05874
rs12286037	11	116157417	0.6909	-0.009802	0.194
rs6589566	11	116157633	0.811	-0.02213	0.01625
rs2075290	11	116158506	0.7553	0.0141	0.0587
rs603446	11	116159645	0.4682	-0.01936	0.193
rs2266788	11	116165896	0.8074	-0.02257	0.01641
rs2075291	11	116166602	0.6603	-0.1465	0.003135
rs651821	11	116167789	0.5117	0.01849	0.1525
rs9804646	11	116170289	0.5582	-0.01247	0.3403
rs2075292	11	116237722	0.3303	0.03641	0.08647
rs508487	11	116580776	0.1264	-0.1444	0.01419
rs1077834	15	56510771	0.02956	0.04425	0.4953
rs10401969	19	19268718	0.9288	-0.002473	0.1666
rs439401	19	50106291	0.4067	-0.02376	0.1568
rs445925	19	50107480	0.04317	0.0473	0.2796
rs12721054	19	50114427	0.3991	-0.02651	0.1139

## Sheet: TC_adjusted_premedication
SNP	Chr	pos	Group1:pval	Group1:es	Group1:caf
rs11591147	1	55278235	0.8498	2.898	0.003134
rs11806638	1	55290748	0.8128	-0.4341	0.3141
rs2495477	1	55291055	0.8195	-0.4337	0.2941
rs28362286	1	55301803	0.8264	-1.713	0.009135
rs1168013	1	62769426	0.8414	-0.3547	0.3556
rs3850634	1	62823186	0.3513	1.636	0.3889
rs6587980	1	62863446	0.569	-0.9674	0.4197
rs660240	1	109619361	0.846	0.3458	0.3366
rs646776	1	109620053	0.71	0.657	0.3437
rs599839	1	109623689	0.7597	-0.5911	0.3012
rs12713956	2	21095010	0.5303	-1.383	0.1787
rs1367117	2	21117405	0.383	2.384	0.1208
rs515135	2	21139562	0.6899	-0.7904	0.4686
rs668948	2	21145034	0.9718	-0.06946	0.4528
rs541041	2	21148480	0.9926	-0.01826	0.4535
rs1260326	2	27584444	0.8232	0.5499	0.1418
rs780094	2	27594741	0.8953	0.2877	0.1742
rs780093	2	27596107	0.4787	1.685	0.1468
rs6544713	2	43927385	0.3381	-2.252	0.1602
rs4245791	2	43927935	0.5346	-1.609	0.1315
rs1423527	5	74638455	0.3169	1.666	0.4172
rs3846662	5	74686840	0.5759	1.38	0.1487
rs12916	5	74692295	0.858	-0.3398	0.2536
rs6882076	5	156322875	0.9463	-0.119	0.3724
rs507666	9	135139220	0.988	-0.04237	0.1023
rs579459	9	135143989	0.5314	1.581	0.1337
rs7350481	11	116091493	0.01851	19	0.0151
rs1558861	11	116112647	0.03002	15.54	0.01684
rs2160669	11	116152817	0.000995	12.04	0.05874
rs6589566	11	116157633	0.03159	16.08	0.01625
rs2075290	11	116158506	0.001407	11.81	0.0587
rs2266788	11	116165896	0.03232	16.02	0.01641
rs651821	11	116167789	0.7894	0.6184	0.1525
rs173539	16	55545545	0.03319	3.859	0.3589
rs247617	16	55548217	0.413	1.593	0.2539
rs3764261	16	55550825	0.1281	2.783	0.3146
rs17231506	16	55552029	0.9411	0.1819	0.1453
rs1864163	16	55554734	0.06213	-3.524	0.2817
rs6511720	19	11063306	0.5135	-1.626	0.1342
rs2228671	19	11071912	0.5073	-3.093	0.03672
rs688	19	11088602	0.761	-0.8409	0.116
rs737337	19	11208493	0.1076	2.774	0.4214
rs8106922	19	50093506	0.01636	-4.698	0.2452
rs769449	19	50101842	0.1235	-8.226	0.02602
rs445925	19	50107480	0.565	1.101	0.2796
rs12721054	19	50114427	0.8146	-0.5992	0.1139
