# Supplementary material for: Assessment of multi-population polygenic risk scores for lipid traits in African Americans
Source: PeerJ journal article supplement (doi:10.7717/peerj.14910), 2023-05-16

**Supplementary Figure 1. Distributions of HDL-C, LDL-C, TG, and TC polygenic risk scores among African American adults, unweighted and weighted.** Unweighted and weighted population-appropriate PRSs for HDL-C, LDL-C, TG, and TC were calculated for each patient based on published summary statistics for diverse populations from the PAGE Study (Hu et al., 2020). As described in Methods & Materials, we calculated unweighted PRSs for each patient and each lipid trait by counting the number of risk alleles for 42, 34, 50, and 46 HDL-C, LDL-C, TG, and TC-associated SNPs, respectively. PRSs were weighted using the absolute value of the betas for the corresponding associations published by the PAGE Study (Hu et al., 2020).

**A) HDL-C, unweighted**

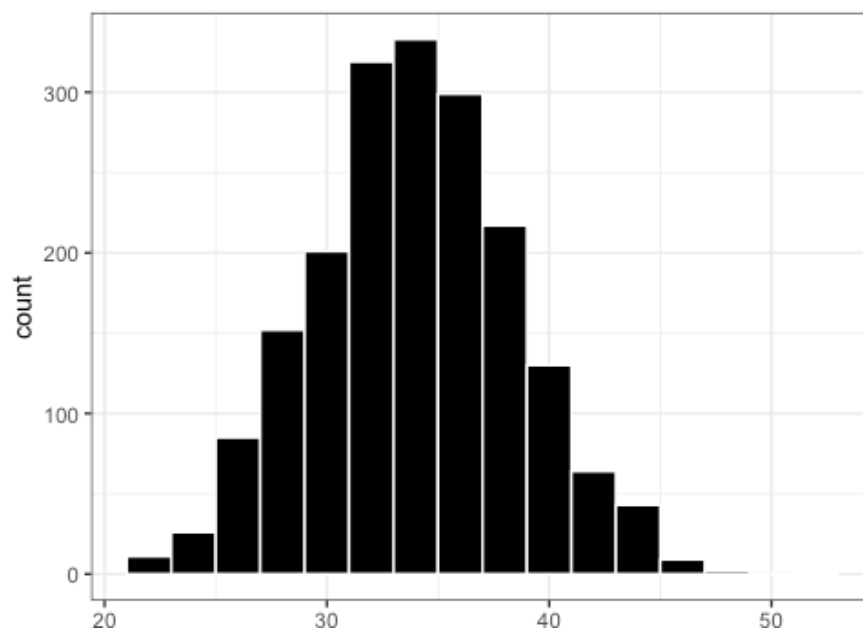

**B) LDL-C, unweighted**

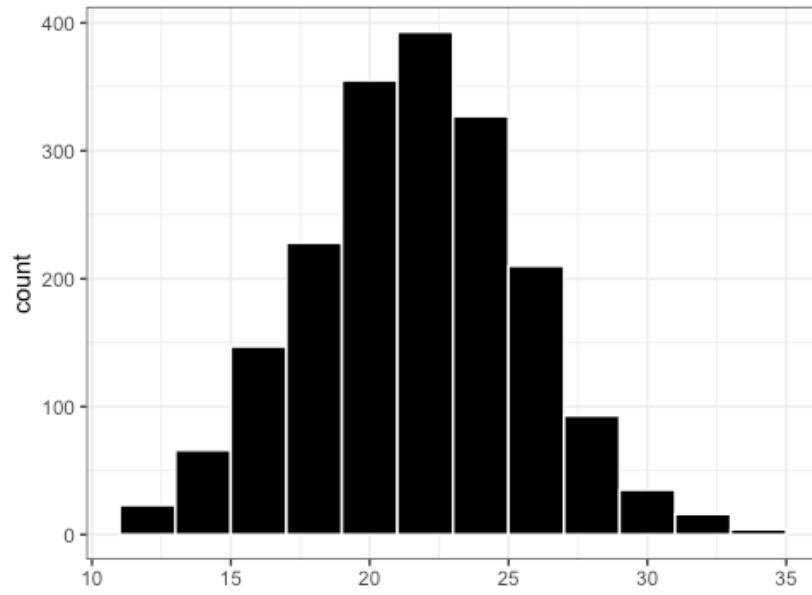

**C) TG, unweighted**

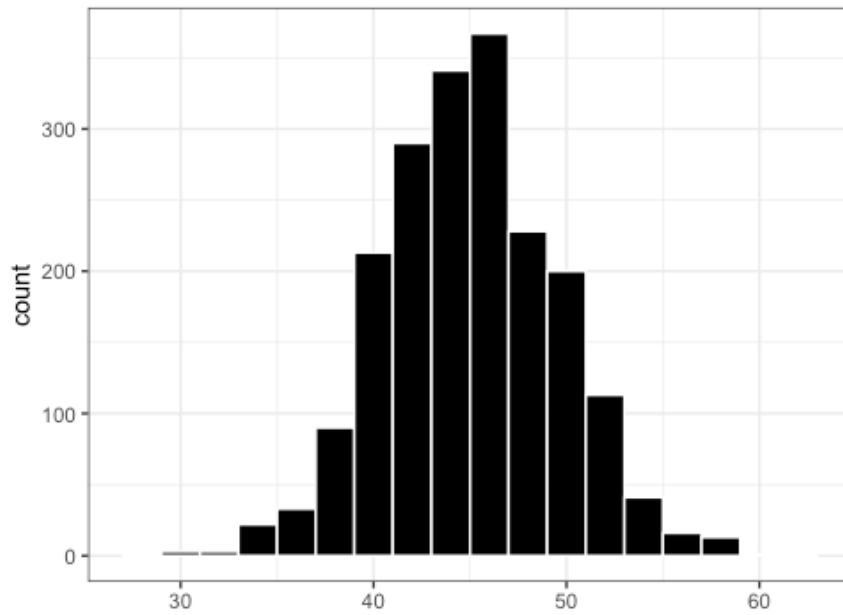

**D) TC, unweighted**

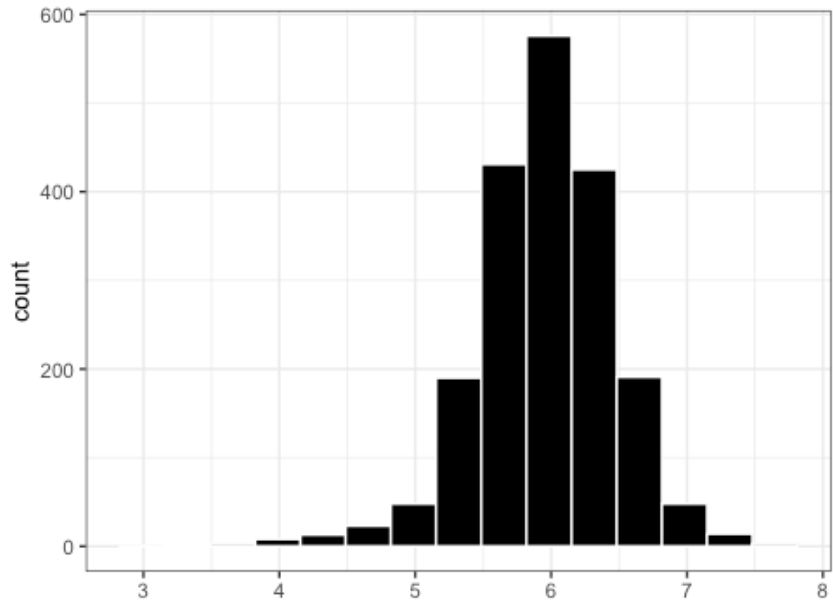

**E) HDL-C, weighted**

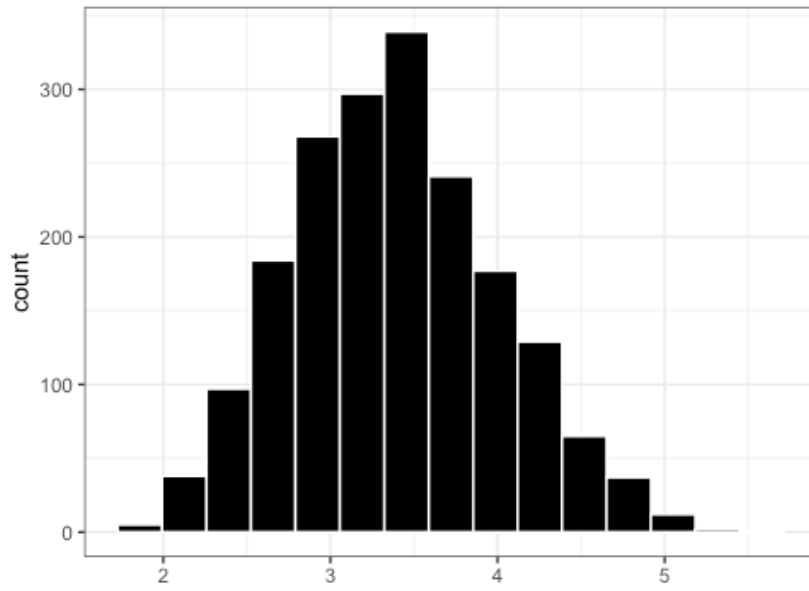

**F) LDL-C, weighted**

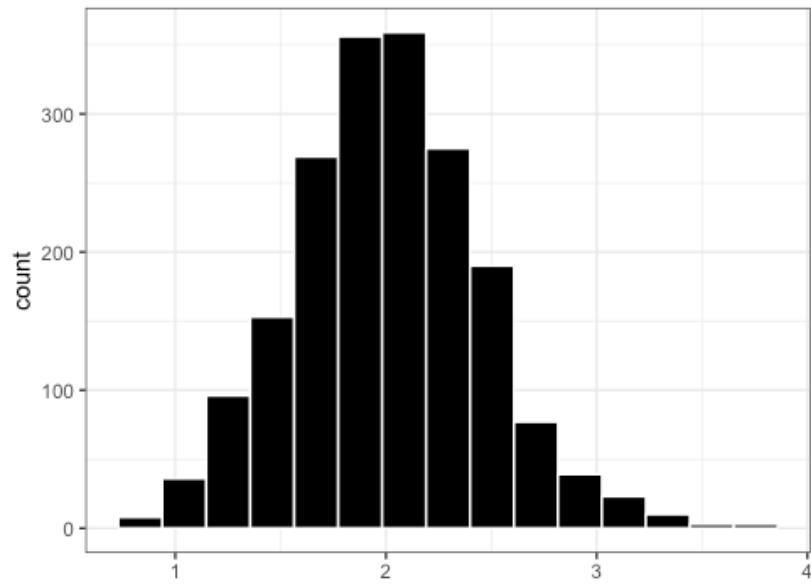

**G) TG, weighted**

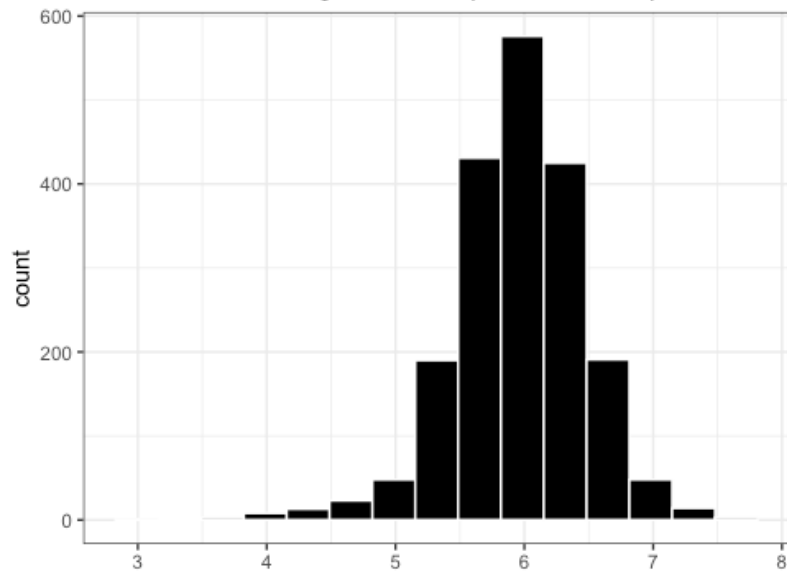

## H) TC, weighted

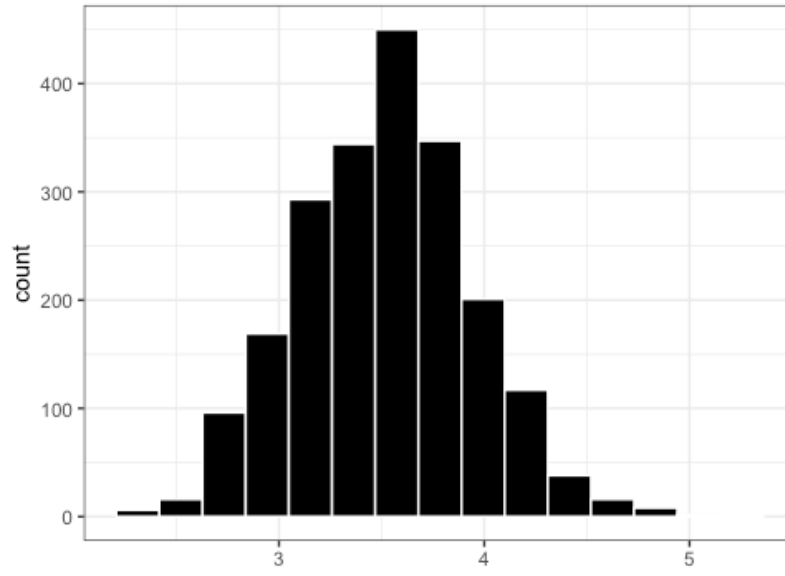

Supplement: Supplementary_figure_1.pdf [file Supplementary_figure_1.pdf]
