# Supplementary material for: Assessment of multi-population polygenic risk scores for lipid traits in African Americans
Source: PeerJ journal article supplement (doi:10.7717/peerj.14910), 2023-05-16

**Supplementary Figure 2. Results of unadjusted single SNP tests of associations among African American adults for a) HDL-C, b) LDL-C, c) TG, and d) TC levels, pre-medication.** Lipid labs were extracted from EHRs and represent the first mention of the laboratory value free of evidence of concurrent lipid lowering medication usage (“pre-medication”). Each SNP was tested for an association with each pre-medication lipid lab using linear regression assuming an additive genetic model. SNP genomic location is given on the x-axis, and p-values ( $-\log_{10}$  transformed) are plotted along the y-axis using genome build NCBI36/hg18 in Synthesis View. The direction of the arrows corresponds to the direction of the beta-coefficient. The significance threshold is indicated by the red line at  $p=0.05$ . Also plotted are the betas and the coded allele frequencies (CAF).

A.

# HDL-C

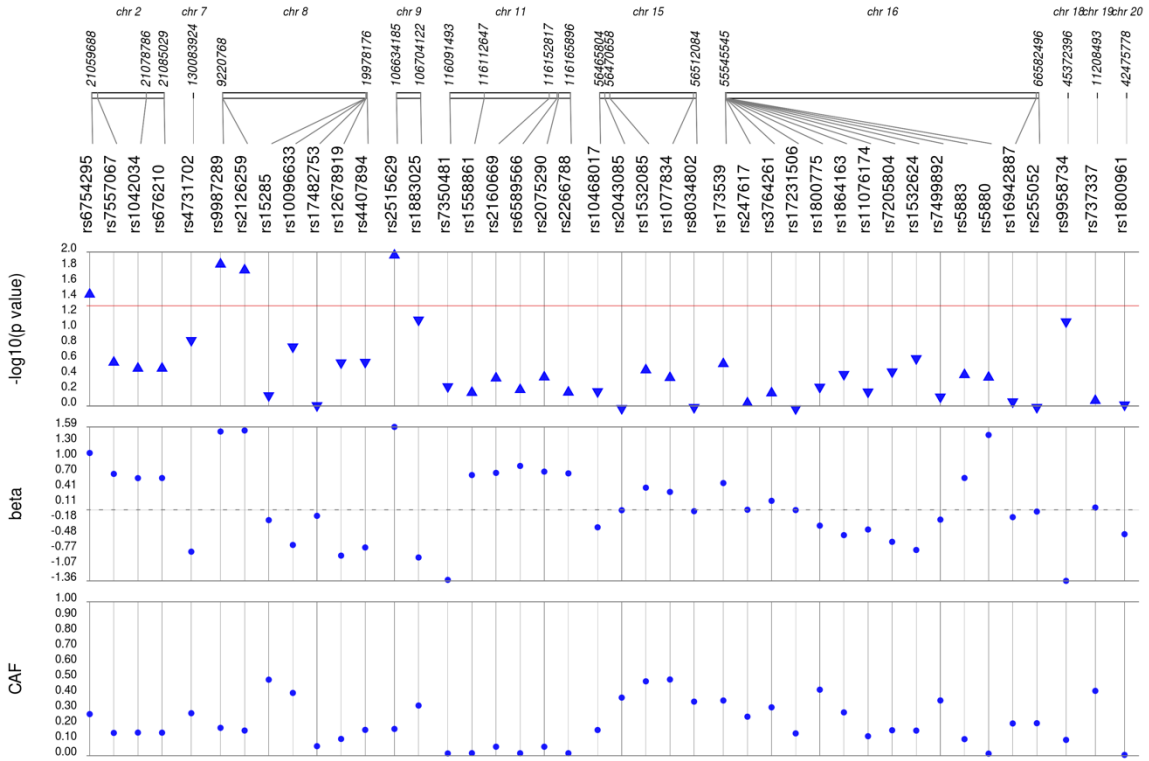

B.

# LDL-C

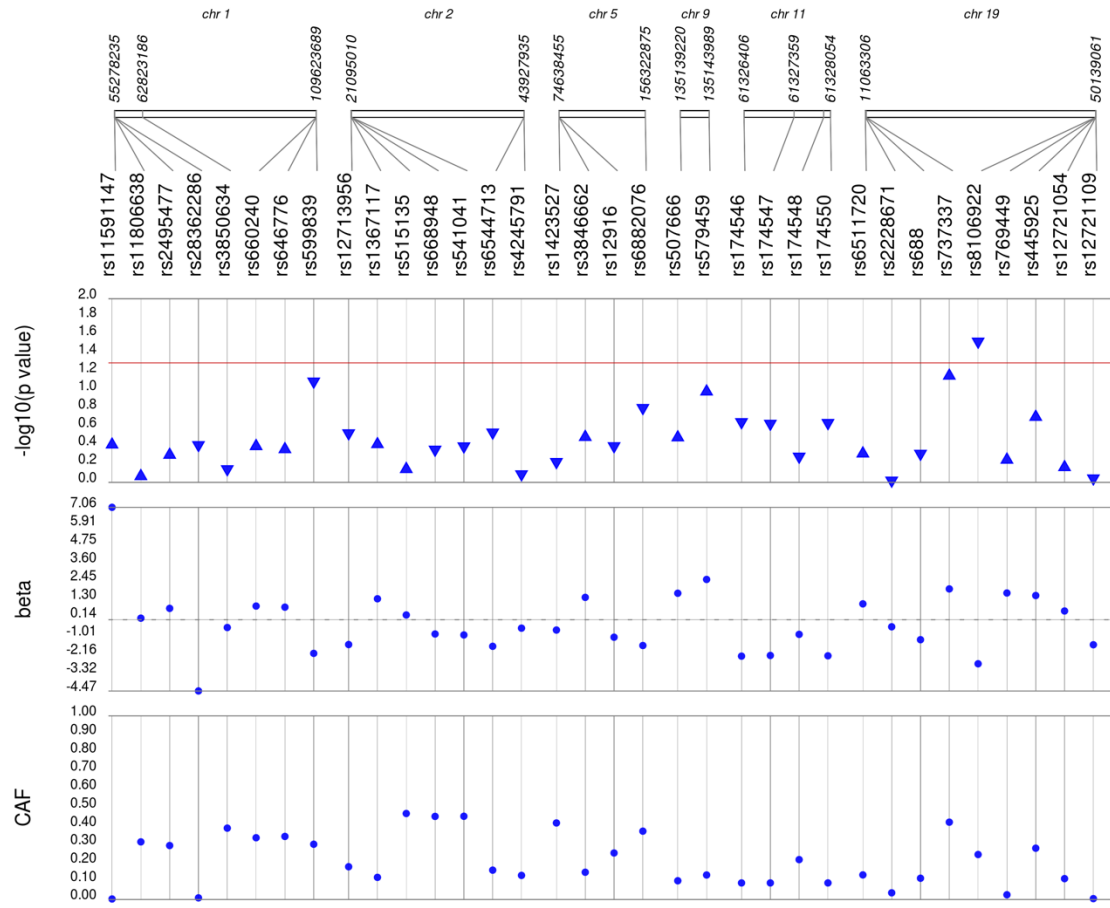

C.

TG

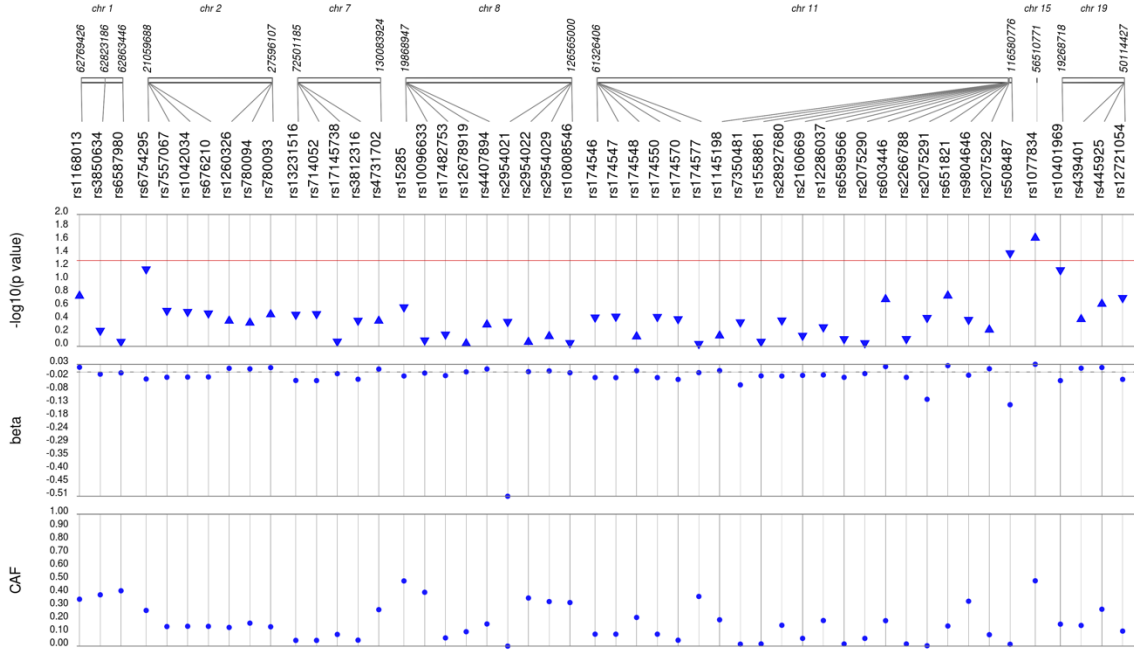

D.

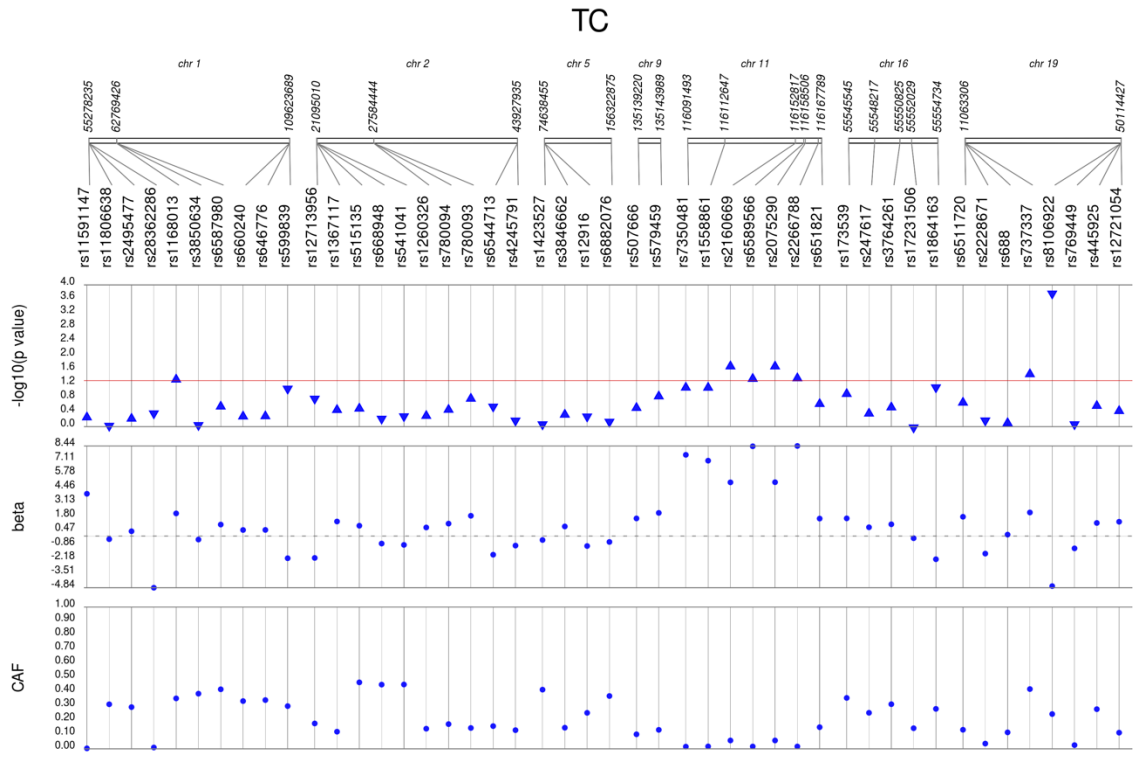

Supplement: Supplementary_figure_2.pdf [file Supplementary_figure_2.pdf]
